# Supplementary material for: Rationally designed Ta3N5@ReS2 heterojunctions for promoted photocatalytic hydrogen production
Source: Royal Society of Chemistry journal article supplement (doi:10.1039/d1ta09030e), 2021-01-01
Supplement: d1ta09030e1.pdf [file d1ta09030e1.pdf]

## Electronic Supplementary Information

### Rationally Designed Ta<sub>3</sub>N<sub>5</sub>@ReS<sub>2</sub> Heterojunctions for Promoted Photocatalytic Hydrogen Production

*Xiaoqiang Zhan<sup>a,b</sup>, Zhi Fang<sup>b</sup>, Bing Li<sup>a\*</sup>, Haitao Zhang<sup>b</sup>, Leyao Xu<sup>b</sup>, Huilin Hou<sup>b\*</sup>, Weiyou  
Yang<sup>b\*</sup>*

<sup>a</sup> School of Mechanical and Power Engineering, East China University of Science and  
Technology, Shanghai, 200237, P. R. China.

<sup>b</sup> Institute of Micro/Nano Materials and Devices, Ningbo University of Technology, Ningbo  
City, 315211, P. R. China.

## Chemicals:

Tantalum(V) chloride ( $\text{TaCl}_5$ , A.R., Aladdin), glucose (Hushi), ammonium perrhenate ( $\text{NH}_4\text{ReO}_4$ , A.R., Aladdin), thiourea ( $\text{CH}_4\text{N}_2\text{S}$ , AR, Hushi, China), hydroxylamine hydrochloride ( $\text{HONH}_3\text{Cl}$ , A.R., Aladdin), Sodium sulfide ( $\text{Na}_2\text{S}$ , A.R., Aladdin), sodium sulfate ( $\text{Na}_2\text{SO}_3$ , AR, Hushi), Nafion perfluorinated resin solution (AR, Sigma-aldrich), ethanol ( $\text{C}_2\text{H}_6\text{O}$ , AR, Aladdin), and deionized water (Millipore,  $18.2 \text{ M}\Omega\cdot\text{cm}$ ) was used as chemical reagents without further purification.

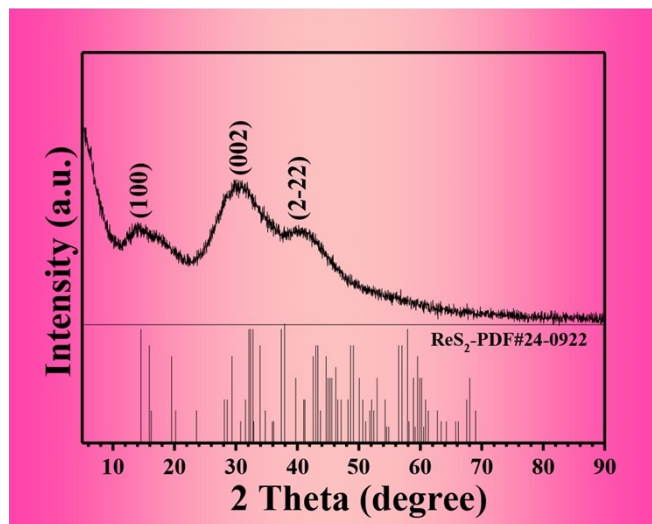

**Fig. S1** XRD pattern of pure ReS<sub>2</sub>.

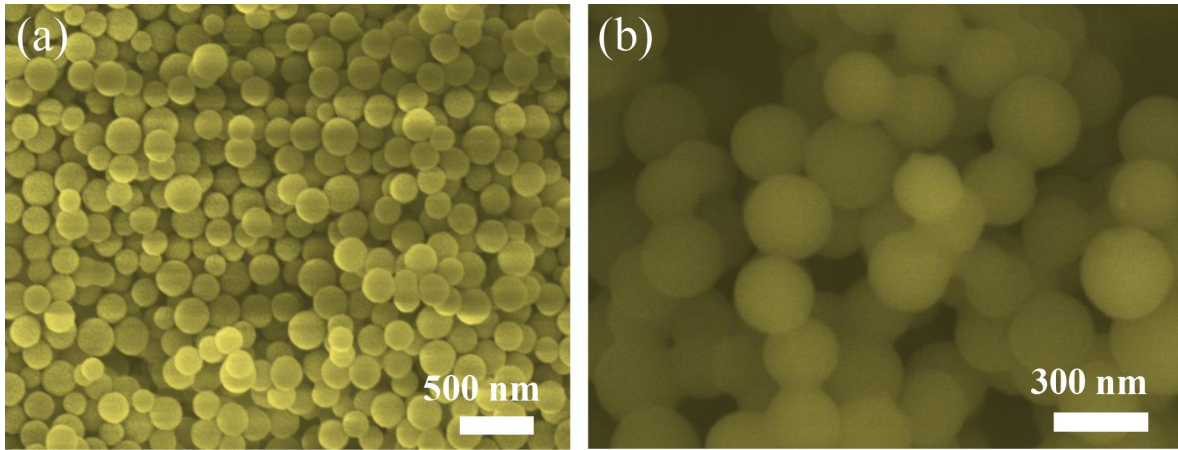

**Fig. S2 (a-b)** Typical SEM images of the used C balls

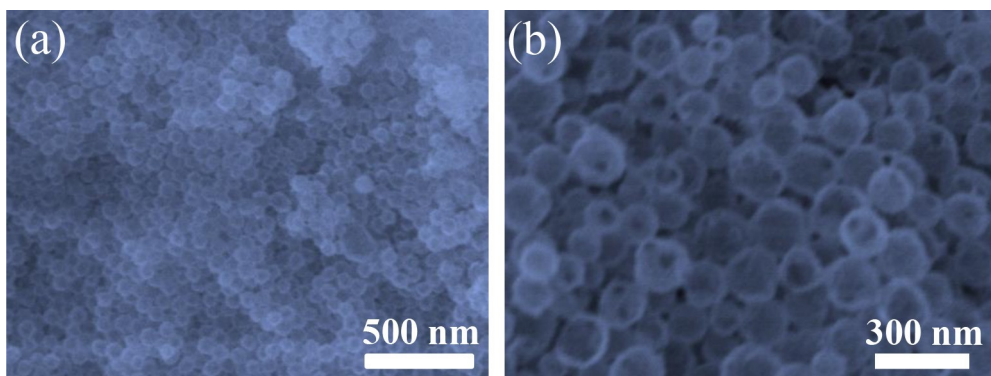

**Fig. S3** (a-b) Typical SEM images of TaOx

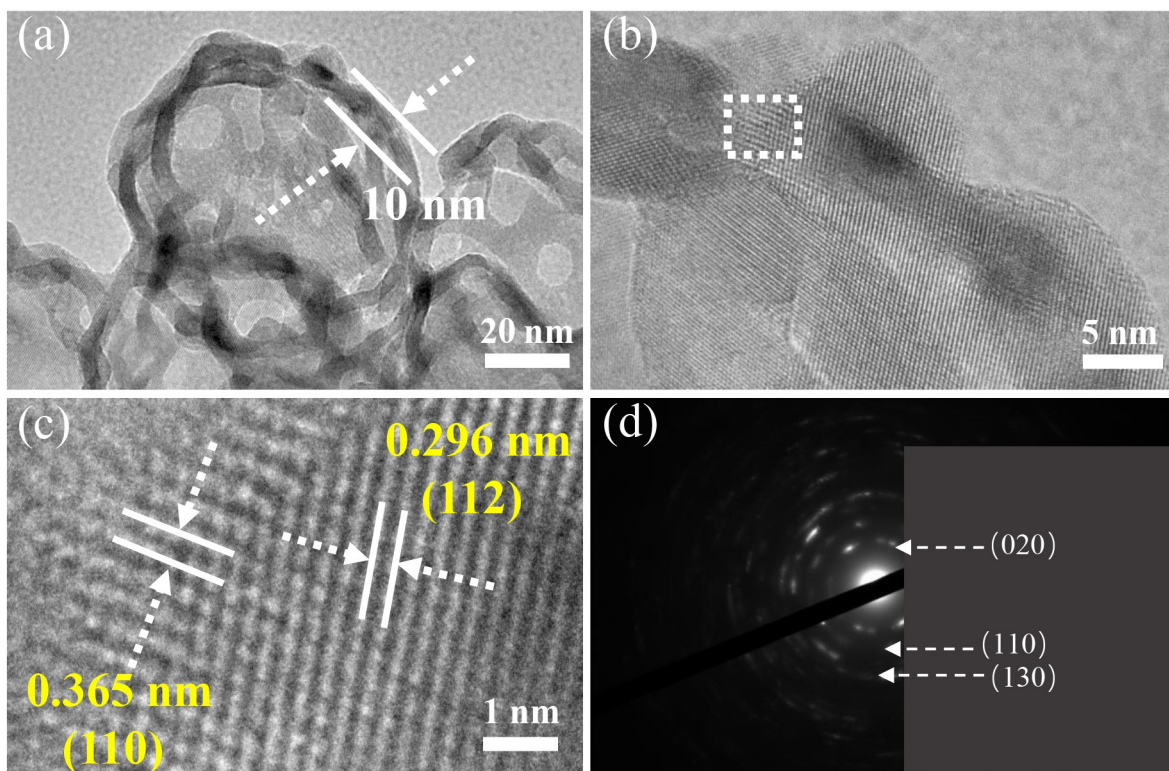

**Fig. S4** TEM images (a-b), HRTEM image (c) and SAED pattern (d) of TR0.

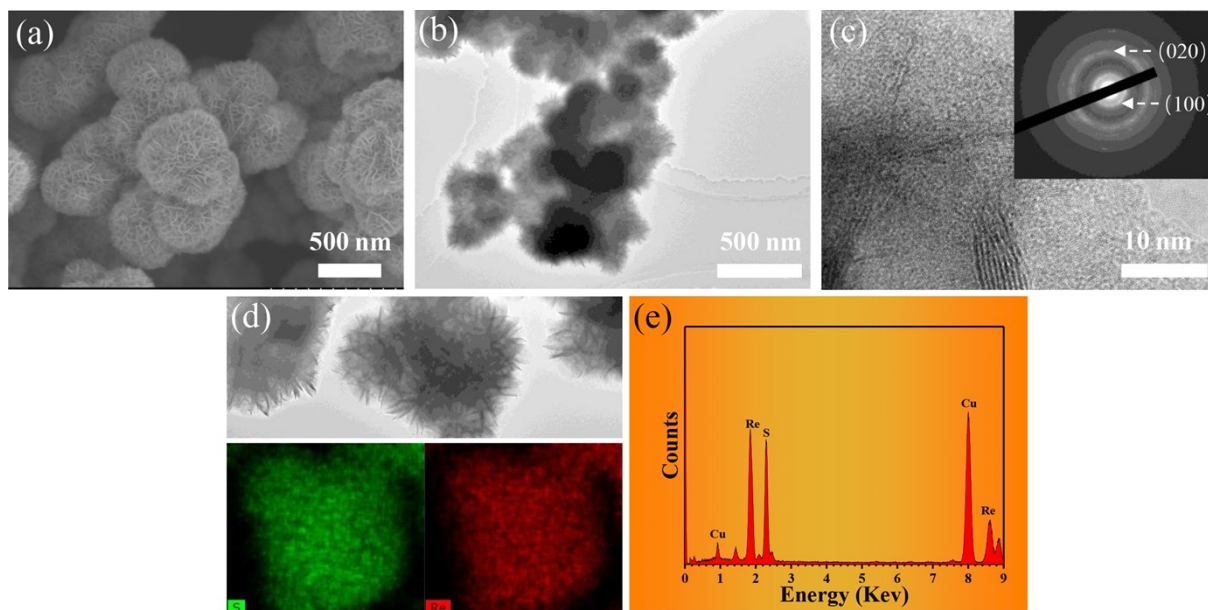

**Fig. S5** TEM images (a-b) and HRTEM image (c) of  $\text{ReS}_2$ , corresponding elemental mapping images (d), and EDX spectrum (e) of  $\text{ReS}_2$ .

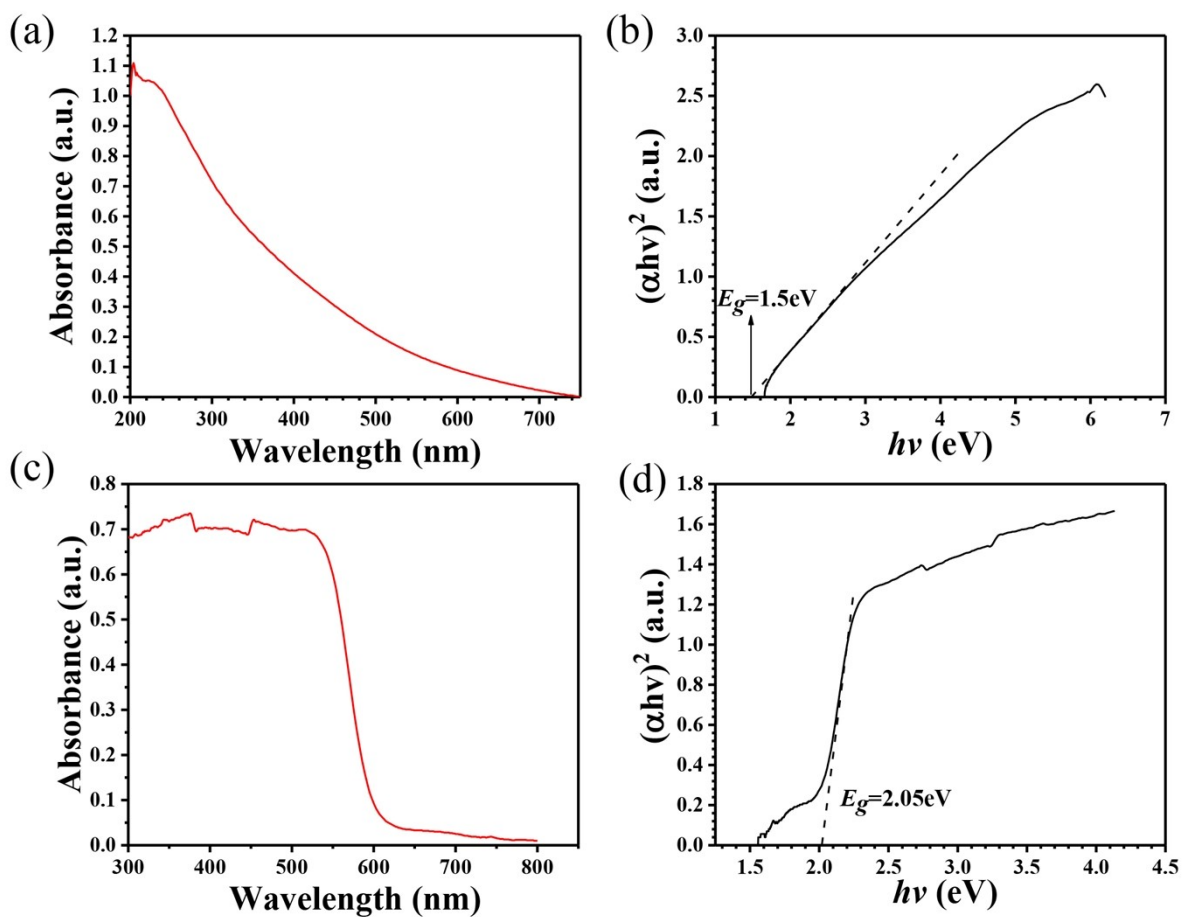

**Fig. S6** (a-b) UV-visible absorption spectrum (a) and the calculated bandgap of ReS<sub>2</sub> (b), respectively. (c-d) UV-visible absorption spectrum (c) and the calculated bandgap of TR0 (d), respectively.



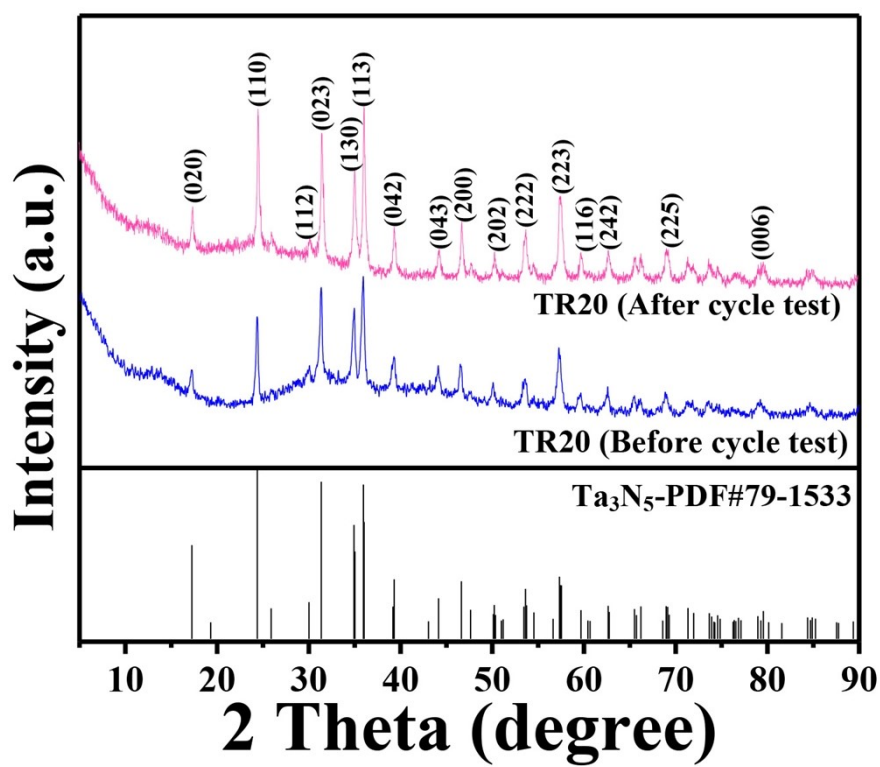

Fig. S7 XRD patterns of TR20 sample before and after cycle test.

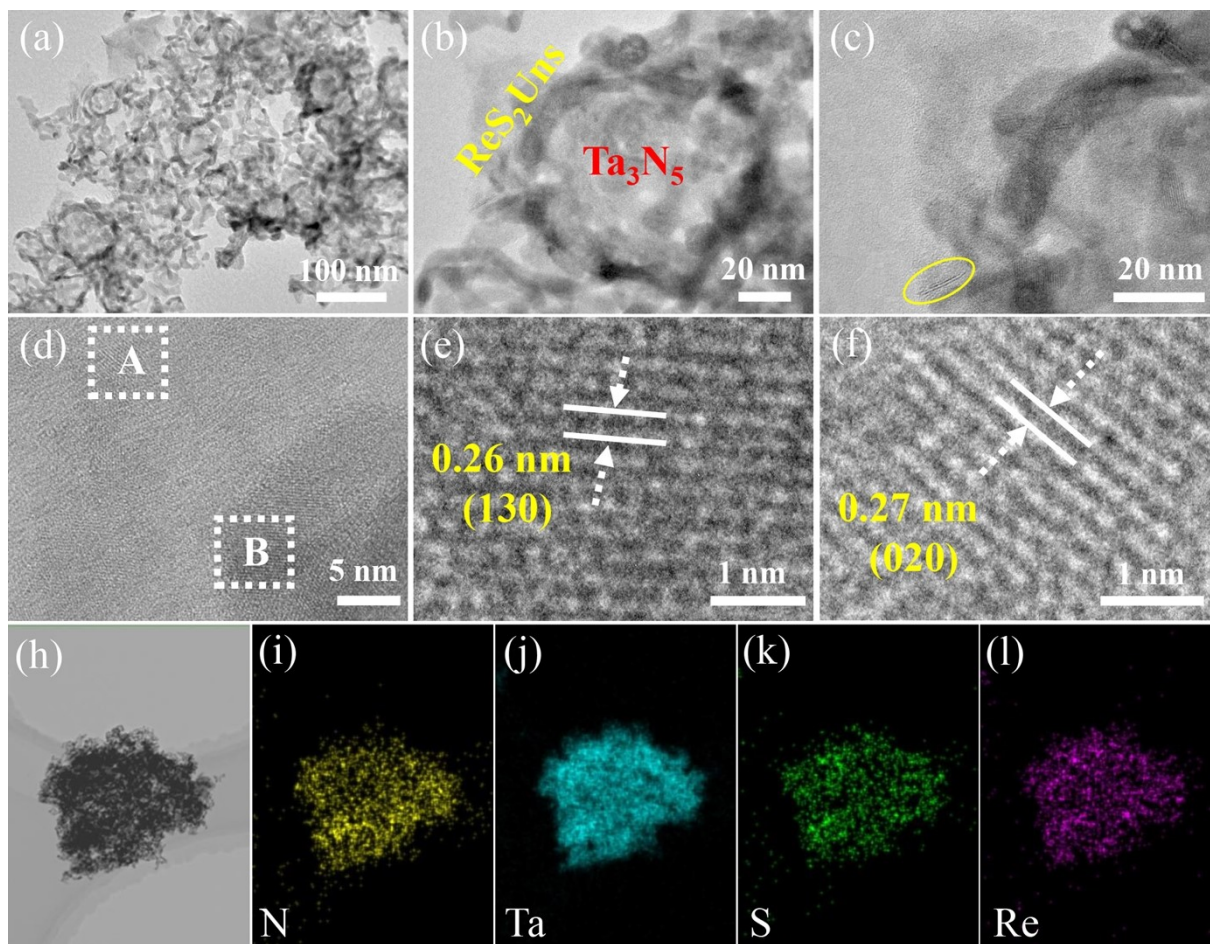

**Fig. S8** TEM images (a-c), HRTEM images (d-f) and element mapping images (h-l) of TR20 sample after cycle test.

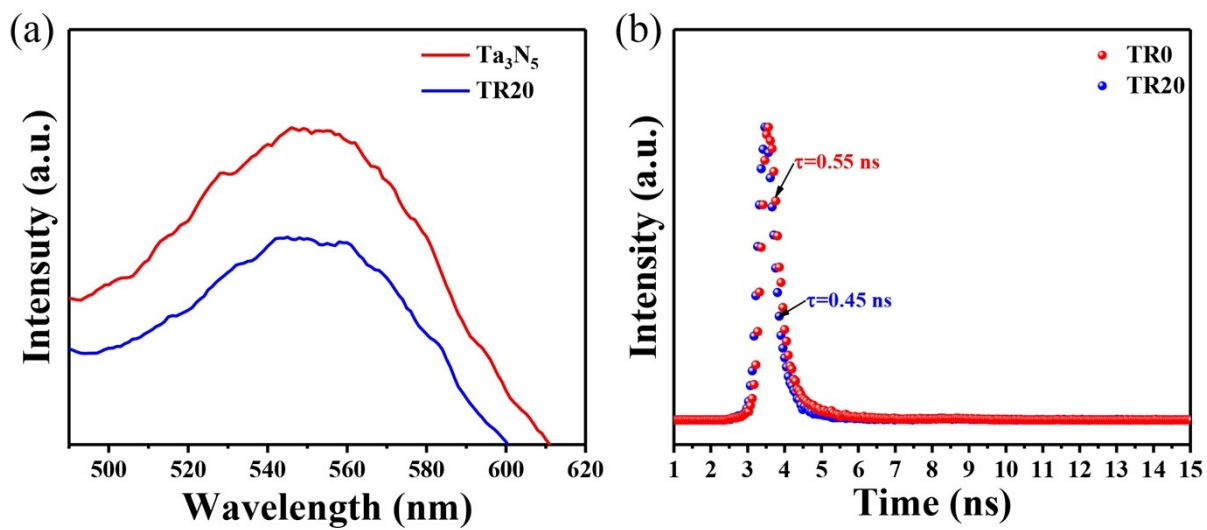

**Fig. S9** (a-b) Steady state (a) and time-resolved (b) photoluminescence spectra of TR20, respectively.

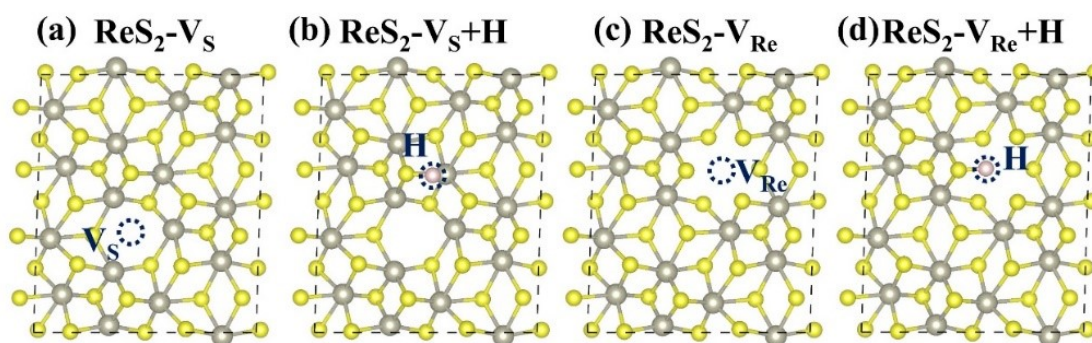

**Fig. S10** (a, c) The optimized  $\text{ReS}_2$  with S vacancy ( $V_S$ ) (a) and Re vacancy ( $V_{\text{Re}}$ ) (c), and (b, d) the corresponding  $\text{H}^*$  adsorption around defects, respectively.

Discussion:

An exploration on the impact of defects on HER performance is investigated by DFT. Because  $\text{H}^*$  is adsorbed on the surface of  $\text{ReS}_2$ , in order to exclude the influence of adsorption sites, we mainly compare the effect of defects between sole  $\text{ReS}_2$  systems and  $\text{Ta}_3\text{N}_5@/\text{ReS}_2$  heterostructures with the  $\text{H}^*$  adsorbed at the same sites. As show in Fig. S10a-d, some surface defects, *e.g.*, S vacancy ( $V_S$ ) and Re vacancy ( $V_{\text{Re}}$ ), are built in  $\text{ReS}_2$  surface and  $\text{Ta}_3\text{N}_5@/\text{ReS}_2$  heterostructure, where the  $\text{H}^*$  is absorbed at hollow site of among three S atoms closest to the defects. The results show that  $V_S$  could hardly improve the HER performance of  $\text{Ta}_3\text{N}_5@/\text{ReS}_2$  heterostructure, or even weaken that of  $\text{ReS}_2$  surface (see Fig. 9f). In contrast,  $V_{\text{Re}}$  can significantly enhance the adsorption of  $\text{H}^*$ , leading to a much smaller  $\Delta G_{\text{H}^*}$  (0.14 for  $\text{ReS}_2-V_{\text{Re}}$  and 0.06 for  $\text{Ta}_3\text{N}_5@/\text{ReS}_2-V_{\text{Re}}$ ) close to zero with enhanced HER performance. Owing to the higher electronegativity of S (2.58) than that of Re (1.90), the  $\text{H}^*$  trends to be adsorbed with S atom. Besides, the appearance of one  $V_{\text{Re}}$  will inevitably break six Re-S bonds (Fig. S10c), which leads to the dangling bonds of S atoms with unpaired electron that could attract  $\text{H}^*$  for electron pairing. Therefore, the  $V_{\text{Re}}$  brings an improved HER activity of  $\text{ReS}_2$ -based materials. What's more, the combination of  $\text{Ta}_3\text{N}_5$  in the  $\text{Ta}_3\text{N}_5@/\text{ReS}_2$  systems could enhance the HER performance of sole  $\text{ReS}_2$ , regardless of the existed defects. Especially,  $\text{Ta}_3\text{N}_5@/\text{ReS}_2-V_{\text{Re}}$

exhibit better HER performance than both  $\text{Ta}_3\text{N}_5$  and  $\text{ReS}_2\text{-V}_{\text{Re}}$ , representing the synergistic enhancement effect of  $\text{Ta}_3\text{N}_5$ ,  $\text{ReS}_2$  and  $\text{V}_{\text{Re}}$ .

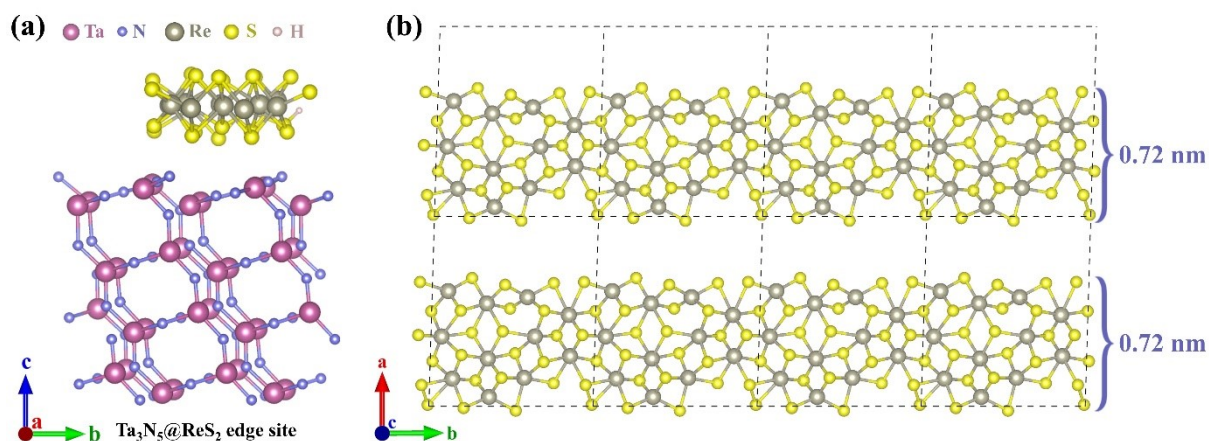

**Fig. S11** The structures of Ta<sub>3</sub>N<sub>5</sub> combined by incomplete ReS<sub>2</sub> with high-concentration  $V_{\text{Re}}$  (a) and ReS<sub>2</sub> sheet with edges (b).

According to the DOS in Fig. 9g(IV), it seems that there are a lot of interface states within the midgap, which would become the center of carrier recombination. With the loss of Re atoms, many unsaturated S atoms at the edge of ReS<sub>2</sub>, implying that there are lots of  $V_{\text{Re}}$  defects at the edge of ReS<sub>2</sub>. Accordingly, it could be concluded that a small number of  $V_{\text{Re}}$  would enhance the adsorption of H\* with thus improved HER performance ( $\Delta G_{\text{H}^*} = 0.06$  eV). However, too much  $V_{\text{Re}}$  would make the adsorption energy of H\* be too high to desorb the H\* with weakened HER performance ( $\Delta G_{\text{H}^*} = -0.24$  eV). In the real experiment, the ReS<sub>2</sub> sheet is  $> 10$  nm, which is too large for DFT calculations. Here, we built a ReS<sub>2</sub> sheet structural model with the size of 0.72 nm (see Fig. S11b), which is much smaller than that in real experiment to generate a much higher concentration of  $V_{\text{Re}}$ . If the concentration of  $V_{\text{Re}}$  are reduced by the edge passivation, the HER performance would get enhanced, implying that there might be an optimal defect concentration toward best HER performance.

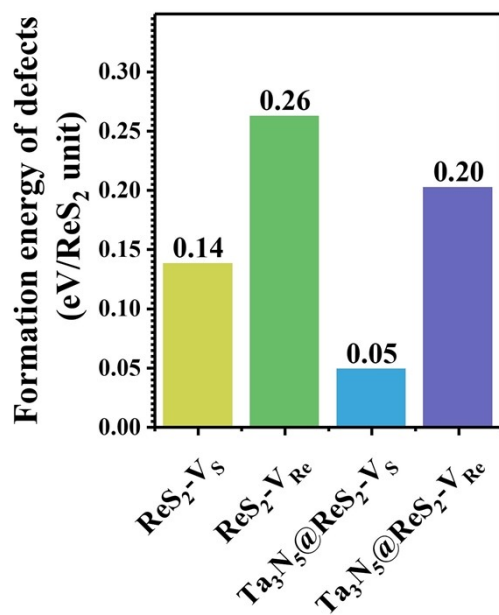

**Fig. S12** The formation energies of the V<sub>S</sub> and V<sub>Re</sub> in sole ReS<sub>2</sub> surface and Ta<sub>3</sub>N<sub>5</sub>@ReS<sub>2</sub> heterostructure.

**Table S1** The atomic ratio of the detected elements in EDX

| element | Atom (%) |
|---------|----------|
| Ta      | 58.78    |
| N       | 35.2     |
| Re      | 2.1      |
| S       | 3.92     |



**Table S2** Comparison of activity for photocatalytic H<sub>2</sub> generation for some Ta<sub>3</sub>N<sub>5</sub> based heterojunctions

| Catalyst                                                         | Light source              | Cocatalyst                         | Amount of H <sub>2</sub> (μmol g <sup>-1</sup> h <sup>-1</sup> ) | AQE                 | Ref.      |
|------------------------------------------------------------------|---------------------------|------------------------------------|------------------------------------------------------------------|---------------------|-----------|
| Ta <sub>3</sub> N <sub>5</sub> /ReS <sub>2</sub> Uns             | 300W Xe lamp              | /                                  | 739.4                                                            | 0.102%<br>at 420 nm | This work |
| Ta <sub>3</sub> N <sub>5</sub> /CdIn <sub>2</sub> S <sub>4</sub> | 300W Xe lamp              | 3 wt% Pt                           | 122.6                                                            | /                   | 1         |
| Ta <sub>3</sub> N <sub>5</sub> /PANI                             | 300W Xe lamp<br>(λ>410nm) | /                                  | 72.6                                                             | /                   | 2         |
| MoS <sub>2</sub> /Ta <sub>3</sub> N <sub>5</sub>                 | 300W Xe lamp              | Pt                                 | 119.4                                                            | /                   | 3         |
| SrTaO <sub>2</sub> N/Ta <sub>3</sub> N <sub>5</sub>              | 300W Xe lamp<br>(λ>420nm) | 4 wt% Pt                           | 19.07                                                            | /                   | 4         |
| MgO/Mg-Ta <sub>3</sub> N <sub>5</sub>                            | 300W Xe lamp<br>(λ>400nm) | 1 wt% Pt<br>2 wt% CoO <sub>x</sub> | 588                                                              | 0.31%<br>at 400 nm  | 5         |
| Ta <sub>3</sub> N <sub>5</sub> /MoS <sub>2</sub>                 | 300W Xe lamp<br>(λ>420nm) | /                                  | 565                                                              | 0.882%<br>at 420 nm | 6         |
| Ta <sub>3</sub> N <sub>5</sub> Nanomeshes                        | Simulated<br>sun light    | 1 wt% Pt                           | 580                                                              | 0.53%<br>at 450 nm  | 7         |
| Ta <sub>3</sub> N <sub>5</sub> /SrTaO <sub>2</sub> N             | 300W Xe lamp<br>(λ>420nm) | 3 wt% Pt                           | 77.31                                                            | /                   | 8         |
| ZnIn <sub>2</sub> S <sub>4</sub> /Ta <sub>3</sub> N <sub>5</sub> | 300W Xe lamp              | 3 wt% Pt                           | 834.86                                                           | /                   | 9         |
| Ta <sub>3</sub> N <sub>5</sub> -WO <sub>2.72</sub>               | 150 W Xe lamp             | Pt                                 | 516                                                              | /                   | 10        |

## References

- 1 Z. Peng, Y. Jiang, Y. Xiao, H. Xu, W. Zhang and L. Ni, Appl. Surf. Sci., 2019, 487, 1084-1095.
- 2 B. Niu and Z. Xu, J. Catal. , 2019, 371, 175-184.
- 3 M. Xiao, B. Luo, S. Thaweesak and L. Wang, Prog. Nat. Sci. Mater., 2018, 28, 189-193.
- 4 W. Zeng, S. Cao, L. Qiao, A. Zhu, P. Tan, Y. Ma, Y. Bian, R. Dong, Z. Wang and J. Pan, J. Colloid Interface Sci. , 2019, 554, 74-79.
- 5 M. Xiao, Z. Wang, B. Luo, S. Wang and L. Wang, Appl. Catal. B 2019, 246, 195-201.
- 6 L. Pei, Y. Yuan, J. Zhong, T. Li, T. Yang, S. Yan, Z. Ji and Z. Zou, Dalton Trans. , 2019, 48, 13176-13183.
- 7 M. Xiao, B. Luo, M. Lyu, S. Wang and L. Wang, Adv. Energy Mater., 2018, 8, 1701605.
- 8 X. Jia, W. Chen, Y. Li, X. Zhou, X. Yu and Y. Xing, Appl. Surf. Sci. , 2020, 514, 145915.
- 9 Y. Xiao, W. Zhang, Q. Xing, X. Feng, Y. Jiang, Y. Gao, H. Xu, J. Zhang, L. Ni and Z. Liu, Int. J. Hydrogen Energy, 2020, 45, 30341-30356.
- 10 W.-P. Hsu, M. Mishra, W.-S. Liu, C.-Y. Su and T.-P. Perng, Appl. Catal. B, 2017, 201, 511-517.
